# Supplementary material
Source: PubMed Central journal article supplement (PMC4394796)
Supplement: AAC.04911-14_zac005153934so1.pdf [file AAC.04911-14_zac005153934so1.pdf]

Table S4

|                    | 1 | 2 | 3 | 4 | 5 | 6 | 7 | 8 | 9 | 10 | 11 | 12 | 13 | 14 | 15 | 16 | 17 | 18 |
|--------------------|---|---|---|---|---|---|---|---|---|----|----|----|----|----|----|----|----|----|
| <b>1</b> 4-1/98.0  | . | 2 | 3 | 3 | 3 | 3 | 3 | 3 | 3 | 3  | 5  | 5  | 4  | 4  | 4  | 6  | 6  | 6  |
| <b>2</b> 4-1/2.0   | . | . | 3 | 3 | 3 | 3 | 3 | 3 | 3 | 3  | 3  | 3  | 2  | 6  | 4  | 6  | 6  | 6  |
| <b>3</b> 4-2/1.1   | . | . | . | 0 | 0 | 0 | 0 | 0 | 0 | 0  | 2  | 2  | 1  | 3  | 3  | 5  | 5  | 5  |
| <b>4</b> 4-2/1.7   | . | . | . | . | 0 | 0 | 0 | 0 | 0 | 0  | 2  | 2  | 1  | 3  | 3  | 5  | 5  | 5  |
| <b>5</b> 4-2/1.9   | . | . | . | . | . | 0 | 0 | 0 | 0 | 0  | 2  | 2  | 1  | 3  | 3  | 5  | 5  | 5  |
| <b>6</b> 4-2/2.3*  | . | . | . | . | . | . | 0 | 0 | 0 | 0  | 2  | 2  | 1  | 3  | 3  | 5  | 5  | 5  |
| <b>7</b> 4-2/4.0   | . | . | . | . | . | . | . | 0 | 0 | 0  | 2  | 2  | 1  | 3  | 3  | 5  | 5  | 5  |
| <b>8</b> 4-2/4.4   | . | . | . | . | . | . | . | . | 0 | 0  | 2  | 2  | 1  | 3  | 3  | 5  | 5  | 5  |
| <b>9</b> 4-2/25.6  | . | . | . | . | . | . | . | . | . | 0  | 2  | 2  | 1  | 3  | 3  | 5  | 5  | 5  |
| <b>10</b> 4-2/37.7 | . | . | . | . | . | . | . | . | . | .  | 2  | 2  | 1  | 3  | 3  | 5  | 5  | 5  |
| <b>11</b> 4-2/4.6  | . | . | . | . | . | . | . | . | . | .  | .  | 0  | 1  | 5  | 3  | 7  | 7  | 7  |
| <b>12</b> 4-2/10.9 | . | . | . | . | . | . | . | . | . | .  | .  | .  | 1  | 5  | 3  | 7  | 7  | 7  |
| <b>13</b> 4-2/5.7  | . | . | . | . | . | . | . | . | . | .  | .  | .  | .  | 4  | 2  | 6  | 6  | 6  |
| <b>14</b> 4-3/73.1 | . | . | . | . | . | . | . | . | . | .  | .  | .  | .  | .  | 2  | 8  | 8  | 8  |
| <b>15</b> 4-3/26.9 | . | . | . | . | . | . | . | . | . | .  | .  | .  | .  | .  | .  | 8  | 8  | 8  |
| <b>16</b> 4-4/1.9  | . | . | . | . | . | . | . | . | . | .  | .  | .  | .  | .  | .  | .  | 0  | 0  |
| <b>17</b> 4-4/2.9  | . | . | . | . | . | . | . | . | . | .  | .  | .  | .  | .  | .  | .  | .  | 0  |
| <b>18</b> 4-4/94.8 | . | . | . | . | . | . | . | . | . | .  | .  | .  | .  | .  | .  | .  | .  | .  |

The tables show numbers of nucleotide differences between all clusters. The cluster numbering in the distance matrix corresponds to the numbering of the thumbnail plots in Figures 1A–D. The colored numbers (green—BL1, red—EOT1, blue—BL2, magenta—identical resistance pattern), representing pairwise genetic distances between clusters, are those which appear in Figures 1A–D.
